# Supplementary material
Source: PubMed Central journal article supplement (PMC2675627)
Supplement: E08-02-0177_1.pdf [file E08-02-0177_1.pdf]

**Supplementary Figure 1. Effect of MMC on proliferation of HPPL.** HPPL was plated on 6 well dishes coated with laminin at a density of  $5 \times 10^4$  cells/well 1 day before the addition of MMC. After incubation of culture in the presence of MMC for 6 hours, medium containing MMC was replaced with fresh medium. At 0, 1 and 2 days, culture was treated with trypsin and then the number of cell from each well was counted.

**Supplementary Figure 2. Time course of tubular morphogenesis between 14 and 23 hours after the overlay.** X-Y images of vertical X-Z sections in Fig. 3B at the level of top and bottom of the cell layers are shown in panels 2. Boxes in X-Y images in low magnification (panels 1) indicate that the right side of the tubular structure was focused in Fig. 3B.

**Supplementary Figure 3. Uptake of rhodamine 123 by HPPL in sandwich culture.** Rhodamine 123 (Rho123) was added to culture at 4 days after the overlay. After 1 hour of incubation at 37°C, images were taken on a confocal microscope. Rho123 was accumulated in cytosol but not in the apical luminal space.

**Supplementary Figure 4. Analysis for apoptosis in perinatal liver.** Frozen sections of E18, P5, and P10 livers were incubated with anti-EpCAM, a cholangiocyte marker, and anti-cleaved Caspase 3. Arrows indicate apoptotic cholangiocytes, whereas arrowheads indicate apoptotic cells other than cholangiocytes.

### **Supplementary Movies**

At 2 hours after the overlay, we started taking images at 16 different places along the Z-axis at a selected area. We selected the third and seventh X-Y planes and arranged the images into movies. Movie 1 is from X-Y images at the Z7 plane. This movie shows HPPL in the original monolayer. In addition to abundant cellular movements, some cells disappeared from this movie. Movie 2 is from X-Y images at the Z3 plane. This movie shows a X-Y plane above the original monolayer where no cells were detected at the initial time point. Later, the cells that disappeared from movie 1 appeared in this movie, indicating these cells moved up along the Z-axis.

# Supplementary Figure 1

Plate cells

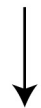

-1 day

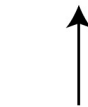

0day

Count cells

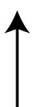

1day

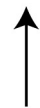

2day

Culture with MMC

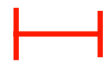

6 hours

Number of cells

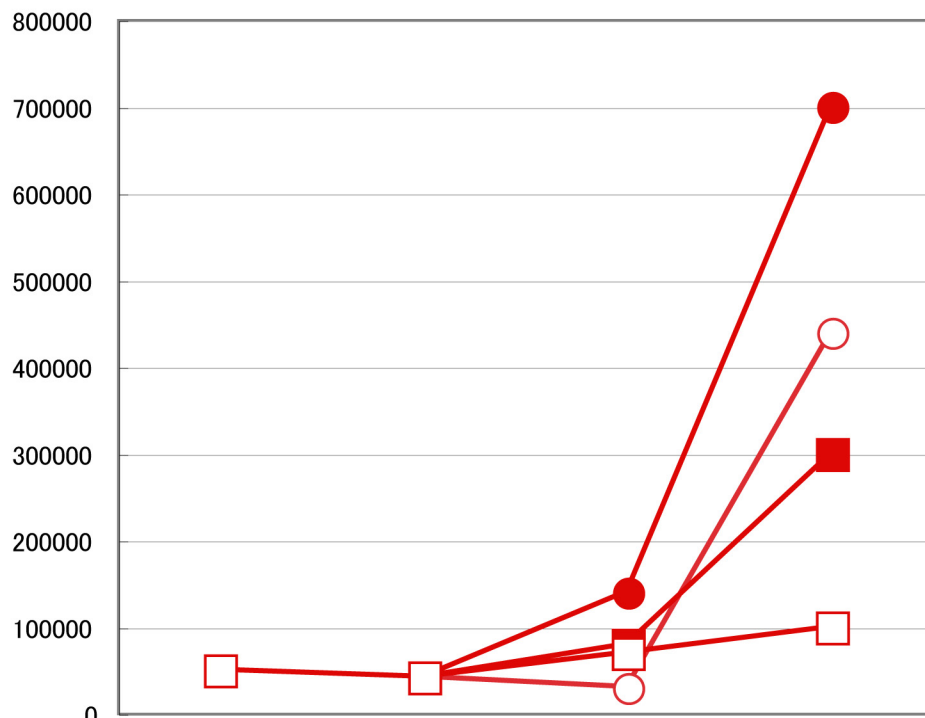

- Control
- 0.5  $\mu\text{g/ml}$  MMC
- 1  $\mu\text{g/ml}$  MMC
- 2  $\mu\text{g/ml}$  MMC

-1      0      1      2

Incubation (days)

## Supplementary Fig. 2

### A. 14 hours after the overlay

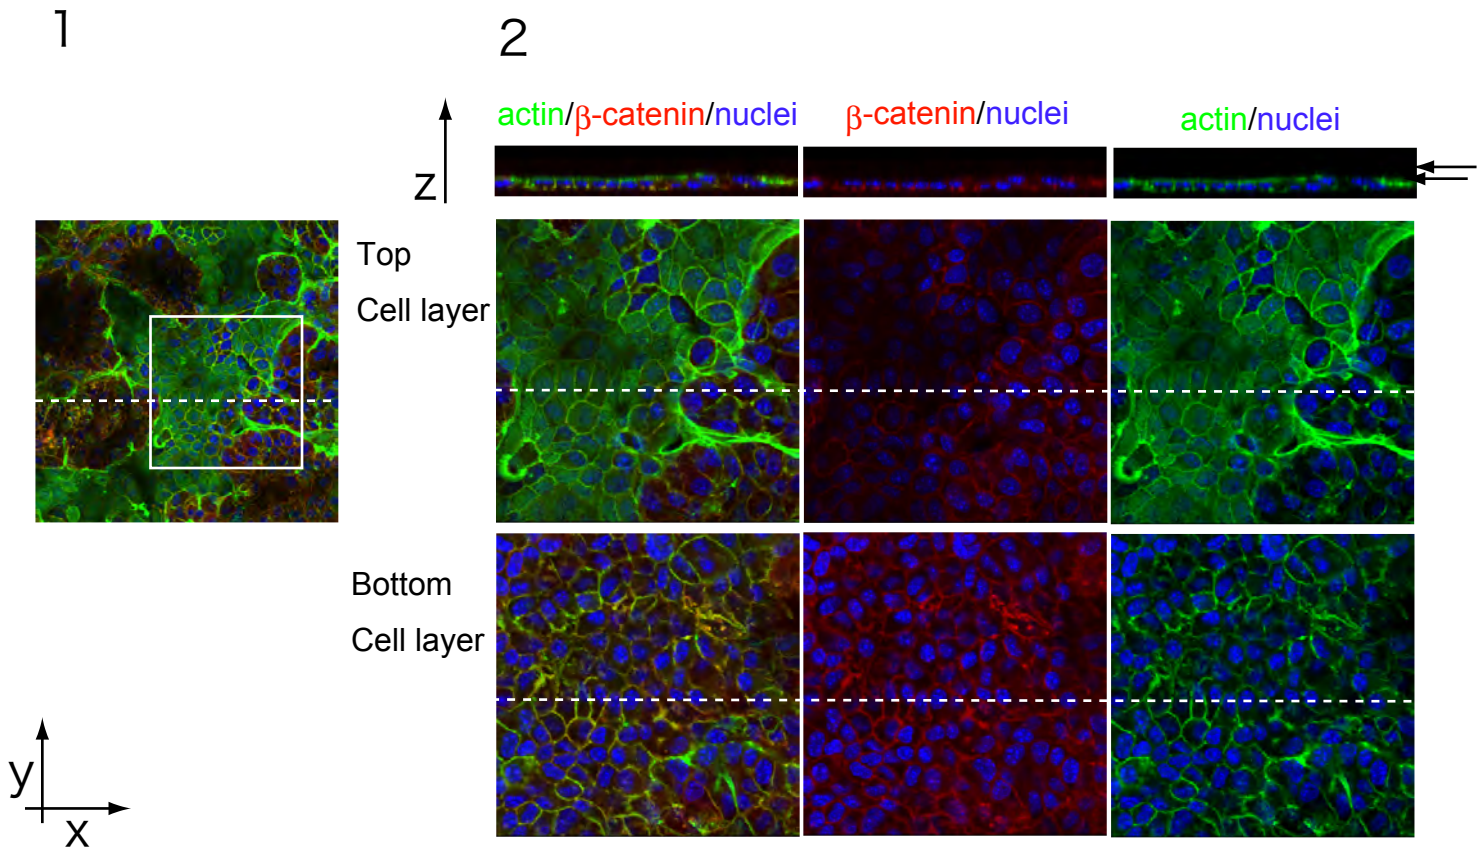

### B. 17 hours after the overlay

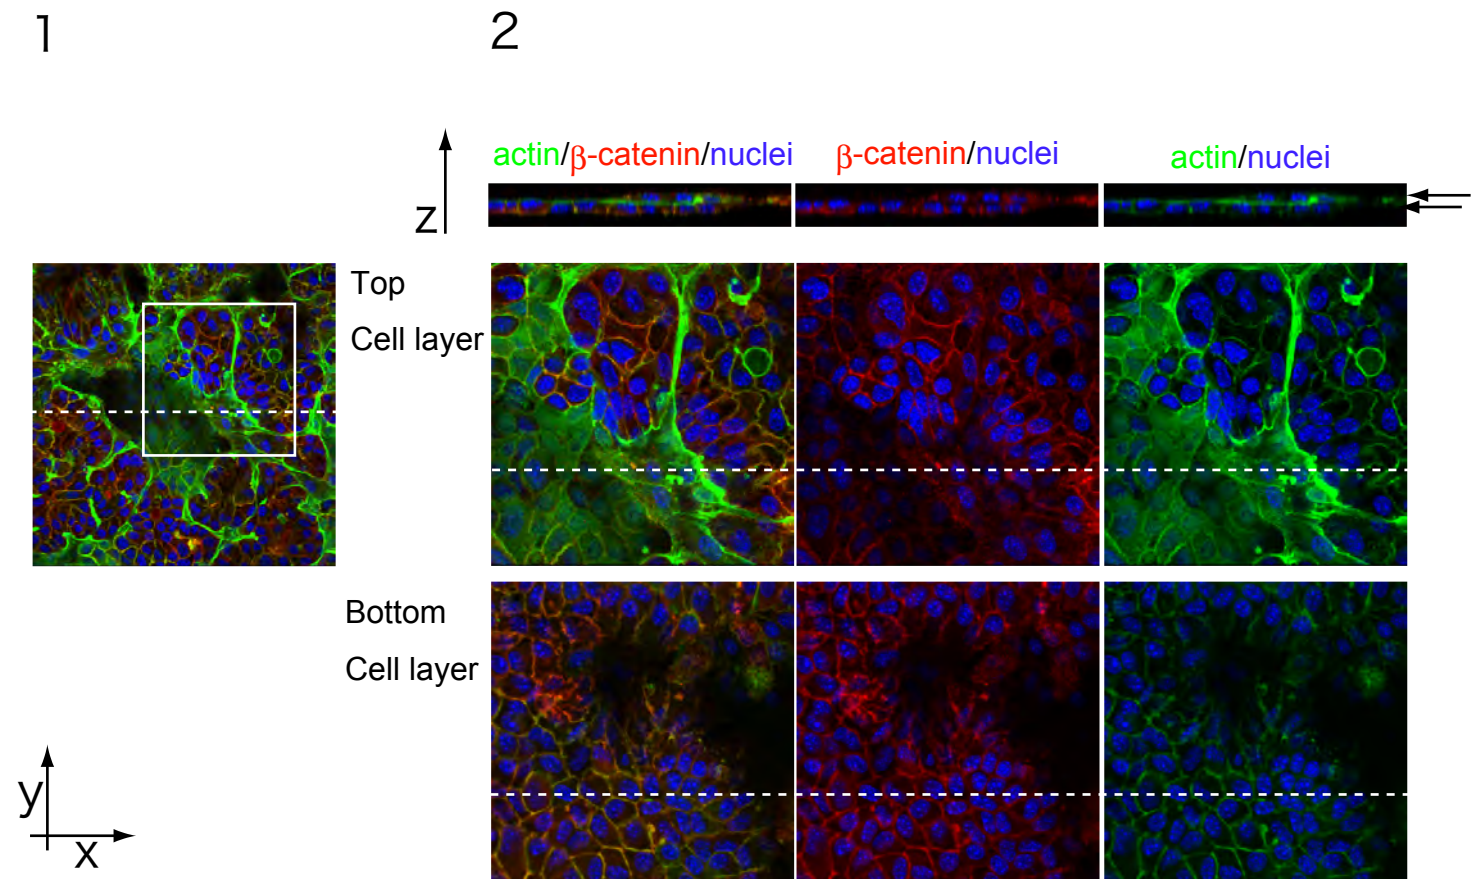

### C. 19 hours after the overlay

1

2

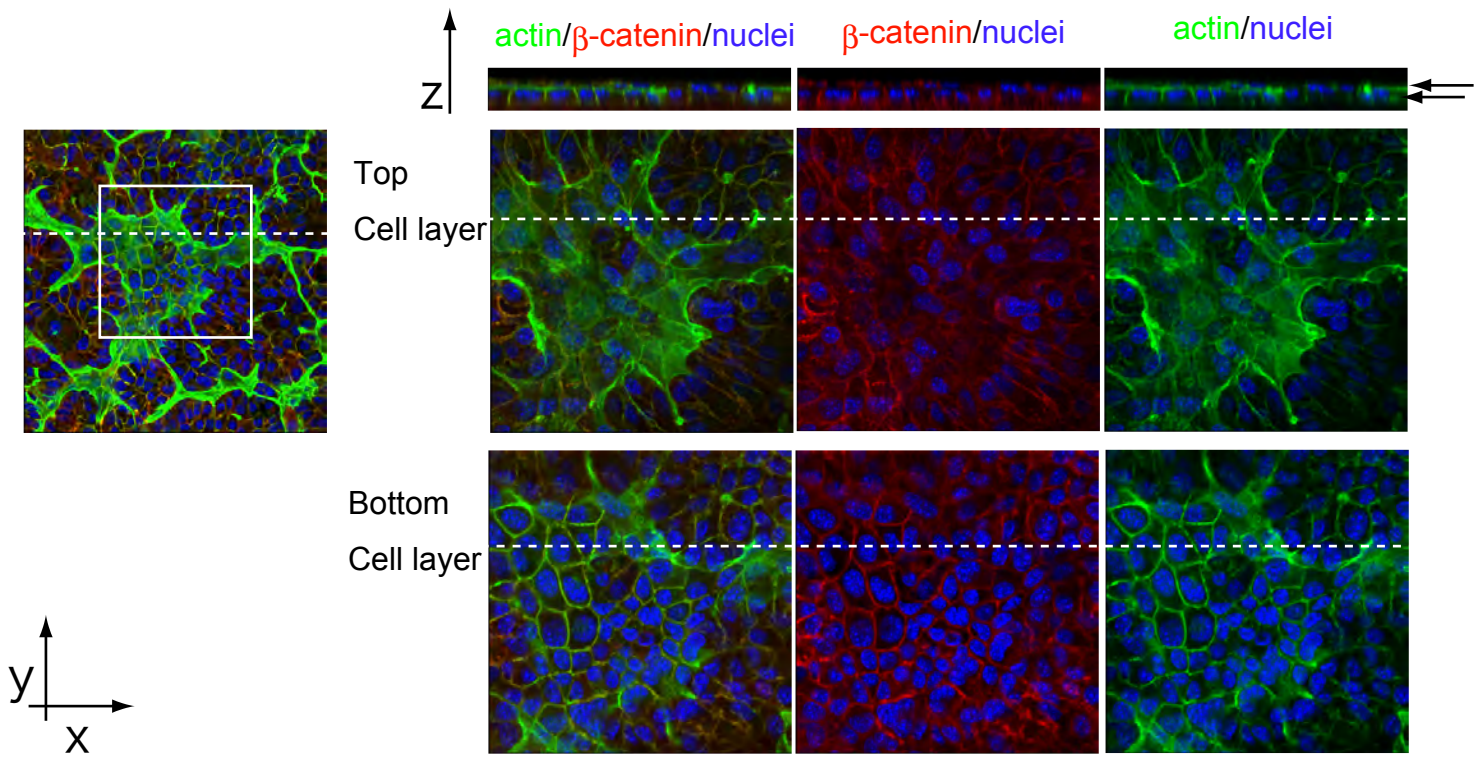

### D. 21 hours after the overlay

1

2

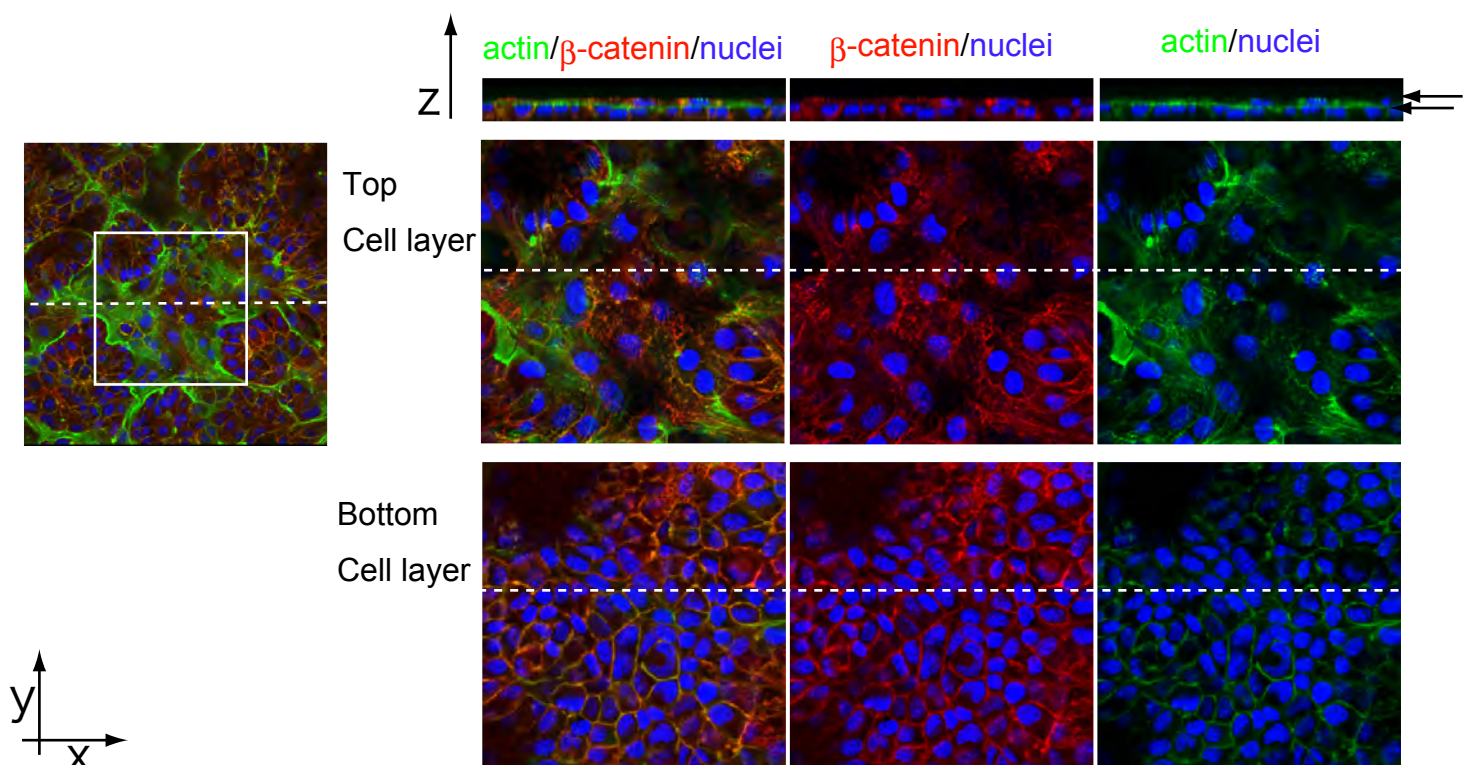

# E. 23 hours after the overlay

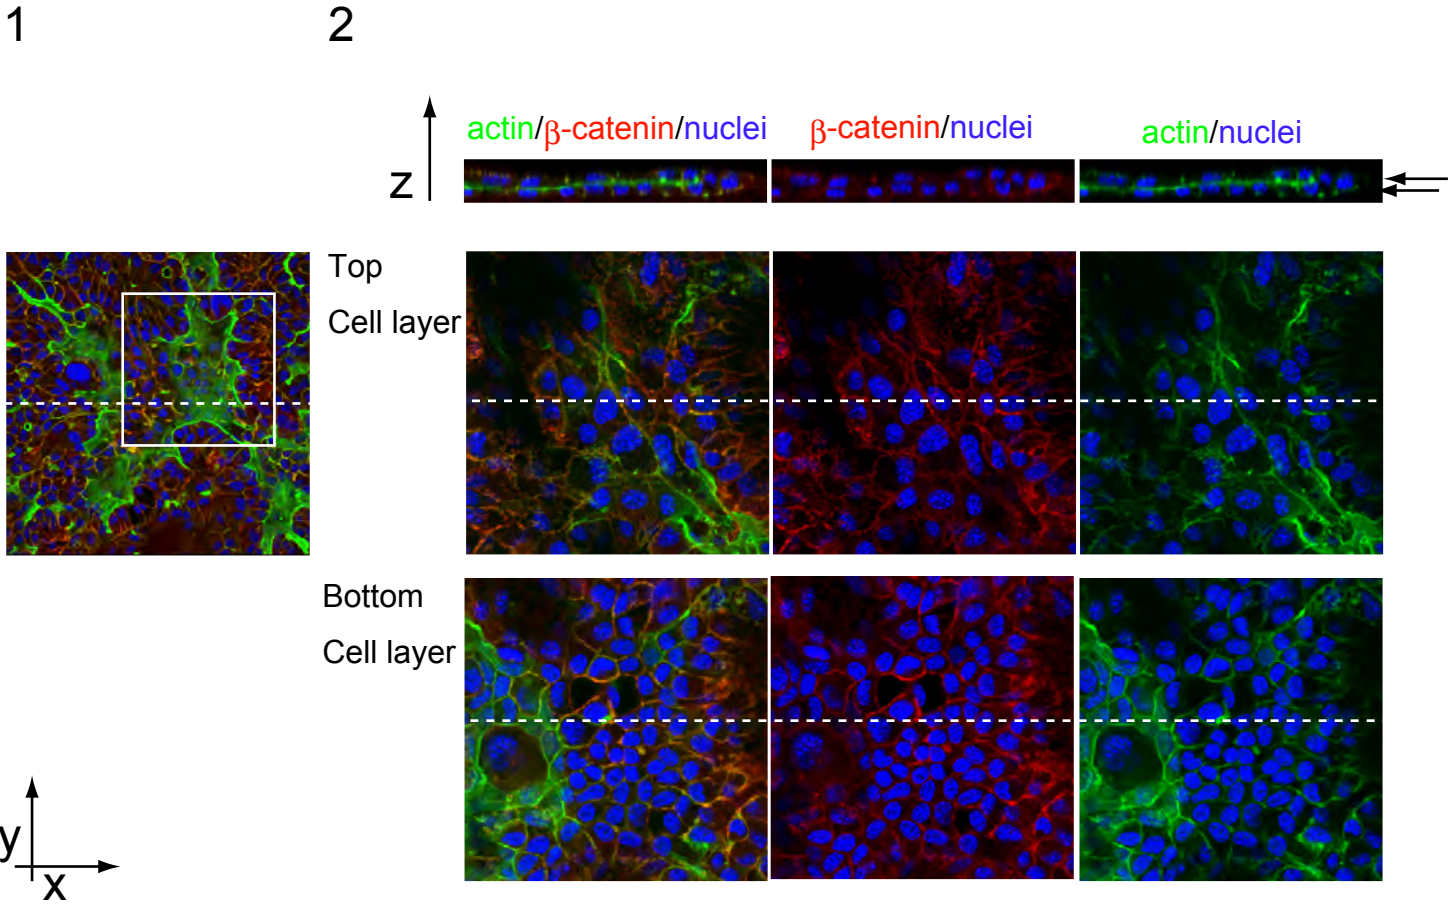

# Supplementary Figure 3

Rho123/Nuclei

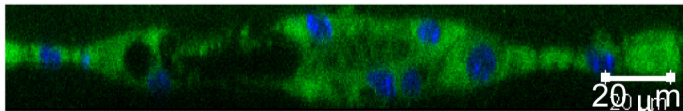

# Supplementary Figure 4

EpCAM/Cleaved Caspase3/Nuclei

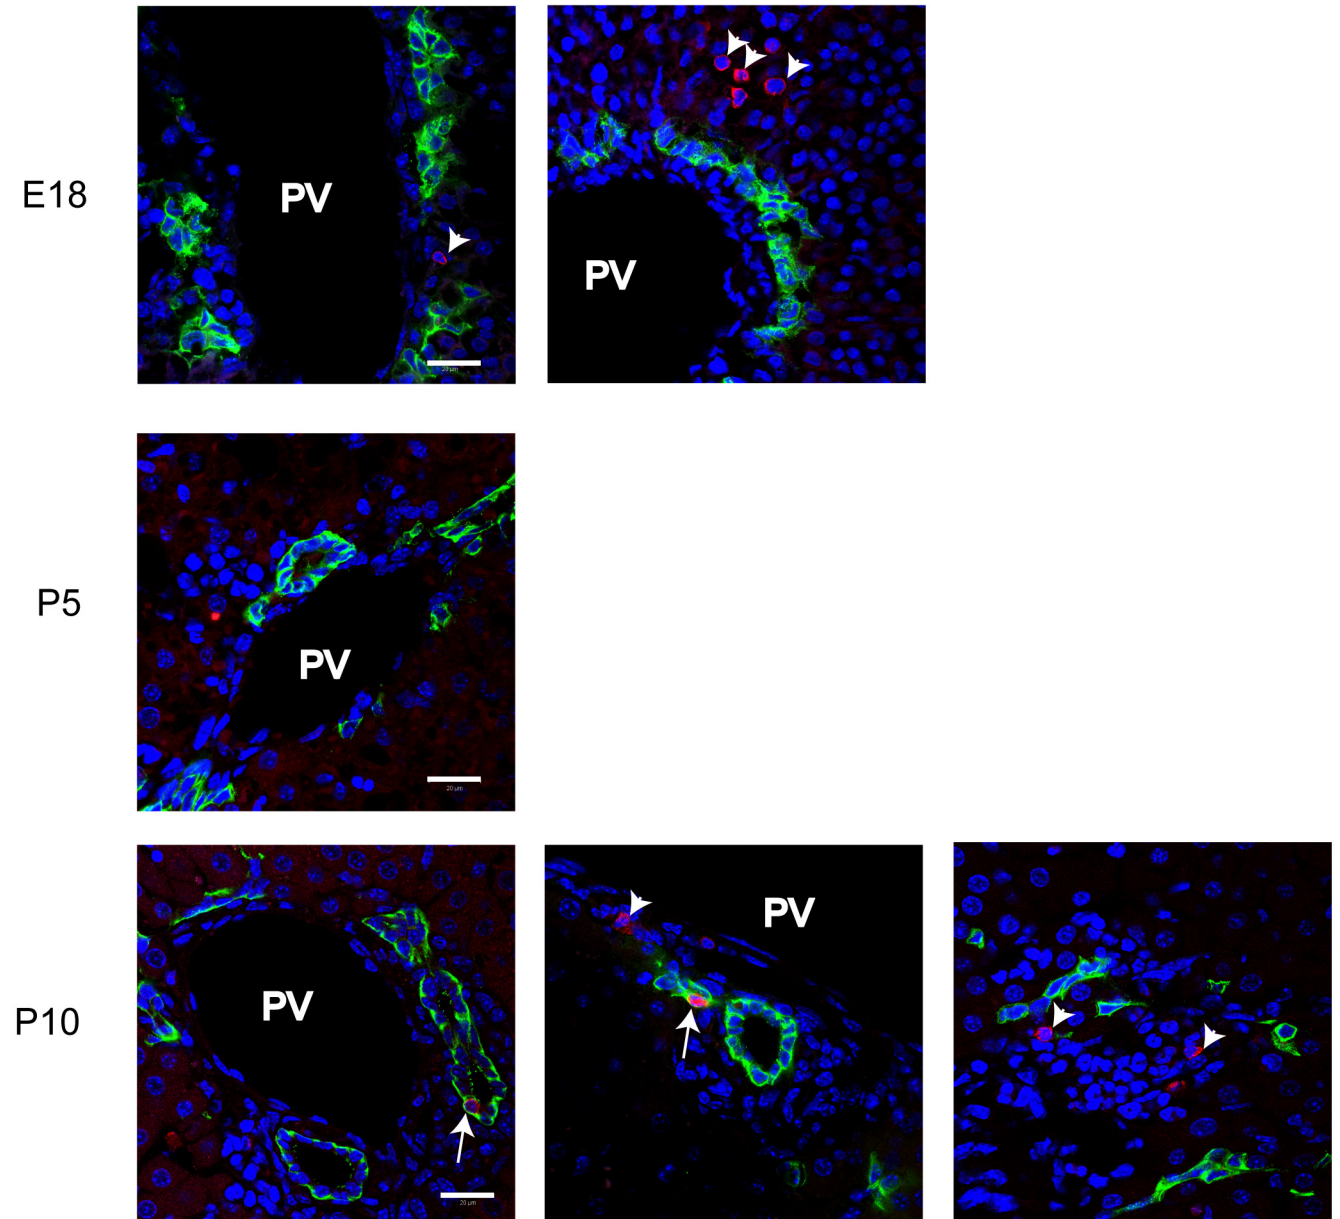

EpCAM+ cells: cholangiocytes

Cleaved Caspase 3+ cell: apoptotic cells

← EpCAM+ Cleaved Caspase 3+ cells

◀ EpCAM- Cleaved Caspase 3+ cells
